# Supplementary material for: Deficiency of Orexin Receptor Type 1 in Dopaminergic Neurons Increases Novelty-Induced Locomotion and Exploration
Source: bioRxiv preprint, doi:10.1101/2023.08.06.552140, version 3 (2024-11-25)
Supplement: Source data-Figure 2 [file 552140_file06.xlsx]

## Sheet: Figure 2A
Numerical data			Statistics
Ctrl	Ox1RΔDAT		Methods	Two-tailed unpaired t test
23.3149	18.8638
29.9582	29.244		P value	0.0172
21.4483	34.6179		Significantly different (P < 0.05)?	*
37.8308	32.2227
13.3812	41.0649		t, df	t=2,539, df=27
16.1734	30.6687		95% confidence interval	1,463 to 13,80
20.9697	18.0616		F, DFn, Dfd	1,003, 14, 13
18.1691	27.3674
21.0088	28.2403
38.7936	30.4217
11.0597	38.9045
23.26	28.8321
20.32	21.0889
19.51	25.0678
	47.536

## Sheet: Figure 2B
Numerical data			Statistics
Ctrl	Ox1RΔDAT		Methods	Two-tailed unpaired t test
70.3	56.9		P value	0.0242
86.9	80.65		Significantly different (P < 0.05)?	*
56.25	91.95
106.85	85.65		t, df	t=2,388, df=27
32.55	117.55		95% confidence interval	2,980 to 39,40
43	88.4		F, DFn, Dfd	1,299, 13, 14
52.3	51.6
54.55	83.25
53.3	86.15
116.9	87.9
27.9	72.1
64.4	84.9
58.65	55.9
55.05	78
	138.65

## Sheet: Figure 2C
Numerical data			Statistics
Ctrl	Ox1RΔDAT		Methods	Two-tailed unpaired t test
403.6	67.2
373.7	315.75		P value	0.0142
299.05	330.25		Significantly different (P < 0.05)?	*
356.5	522.6
130.25	431.2		t, df	t=2,623, df=27
187.3	528.8		95% confidence interval	29,54 to 241,8
275.9	157.75		F, DFn, Dfd	2,529, 14, 13
355.75	487.25
263.15	546.5
507.35	502.6
183.75	721.7
251.45	530.7
189.35	376.7
219.8	313.7
	484.9

## Sheet: Figure  2D
Numerical data			Statistics
Ctrl	Ox1RΔDAT		Methods	Two-tailed unpaired t test
455.45	349.85
488.95	525.05		P value	0.1561
372.8	505.45		Significantly different (P < 0.05)?	No
591.85	525.6
330.55	522.65		t, df	t=1,459, df=27
408.55	505.2		95% confidence interval	-12,88 to 76,28
479.7	456.45		F, DFn, Dfd	1,473, 13, 14
426.75	443.05
397.85	423.9
439.3	436.35
366	385.45
445.45	482.75
417.95	428.9
394.15	441.95
	487.85

## Sheet: Figure 2E
Numerical data			Statistics
Ctrl	Ox1RΔDAT		Methods	Two-tailed unpaired t test
10.652	19.738
16.799	31.724		P value	0.0077
15.721	30.635		Significantly different (P < 0.05)?	**
31.899	13.594
17.507	27.595		t, df	t=2,909, df=24
8.7763	23.489		95% confidence interval	1,962 to 11,54
15.876	22.641		F, DFn, Dfd	1,197, 11, 13
15.452	22.073
15.965	25.343
14.93	16.835
22.574	26.07
19.593	34.834
21.035
22.374

## Sheet: Figure 2F
Numerical data			Statistics
Ctrl	Ox1RΔDAT		Methods	Two-tailed unpaired t test
39.05	62.5
48.8	110.25		P value	0.0096
54.55	99		Significantly different (P < 0.05)?	**
100.3	42.35
53.7	87.7		t, df	t=2,817, df=24
23.2	74.7		95% confidence interval	5,946 to 38,56
48.75	71.1		F, DFn, Dfd	1,391, 11, 13
43.1	71.95
55.25	73.45
45.65	51.3
80.15	74.5
67.95	114.15
56.95
59.5

## Sheet: Figure 2G
Numerical data			Statistics
Ctrl	Ox1RΔDAT		Methods	Two-tailed unpaired t test
11.1	196.75
125.15	100.3		P value	0.0082
35.8	378.6		Significantly different (P < 0.05)?	**
300.05	54.7
66.35	219.75		t, df	t=2,884, df=24
65.7	209.3		95% confidence interval	28,34 to 171,0
26.2	194.2		F, DFn, Dfd	1,281, 11, 13
194.6	219.75
204	233.8
89.15	329.25
155.3	230.8
129.75	347.95
176.35
193.15

## Sheet: Figure 2H
Numerical data			Statistics
Ctrl	Ox1RΔDAT		Methods	Two-tailed unpaired t test
213.5	403.8
407.9	444.8		P value	0.0194
300.2	432.35		Significantly different (P < 0.05)?	*
452.65	373.35
415.75	425.8		t, df	t=2,506, df=24
333.2	388.7		95% confidence interval	8,905 to 91,98
296.2	431.1		F, DFn, Dfd	4,247, 13, 11
421	374.3
368.15	466.8
334.85	373.5
364.2	418.25
375.2	431.35
383.3
419.15

## Sheet: Figure 2J
Numerical data
	pre-NS									pre-orexin									NS									orexin
Ctrl	16013	8567.5	10853	17578	7250	35010	3957.5	4150		10120	43700	15280	3875	14245	17568	2380	9827.5		15743	31340	42773	36580	27013	23260	47410	58438		78850	139918	73868	22913	53435	64998	80555	73713
Ox1RΔDAT	31328	6695	2325	15295	2362.5	13625	3880	2875		50423	9865	8130	9680	21090	30595	9460	8082.5		20040	38173	24740	26438	49925	116145	30183	33225		159310	76110	76055	60203	151033	244618	171470	69285
Statistics
Methods	Two-way RM ANOVA
Matching: Across row
Alpha	0.05
Source of Variation	% of total variation	DF	F (DFn, DFd)	P value	Significant?
Row Factor x Time	5.469	3	F (3, 42) = 3,758	0.0177	*
Row Factor	2.576	1	F (1, 14) = 2,340	0.1484	ns
Time	56.16	3	F (3, 42) = 38,59	<0,0001	****
Subject	15.42	14	F (14, 42) = 2,270	0.0205	*
95% CI of difference between row means	-36144 to 6051
Šídák's multiple comparisons test	95,00% CI of diff,	DF	Adjusted P Value	Significant?
Ctrl
pre-NS vs. pre-orexin	-41164 to 37760	42	>0,9999	ns
pre-NS vs. NS	-61859 to 17064	42	0.6928	ns
pre-NS vs. orexin	-100071 to -21147	42	0.0004	***
pre-orexin vs. NS	-60157 to 18767	42	0.7858	ns
pre-orexin vs. orexin	-98369 to -19445	42	0.0006	***
NS vs. orexin	-77673 to 1250	42	0.0642	ns
Ox1RΔDAT
pre-NS vs. pre-orexin	-48079 to 30844	42	0.9998	ns
pre-NS vs. NS	-72022 to 6901	42	0.1827	ns
pre-NS vs. orexin	-155674 to -76751	42	<0,0001	****
pre-orexin vs. NS	-63405 to 15519	42	0.6015	ns
pre-orexin vs. orexin	-147057 to -68133	42	<0,0001	****
NS vs. orexin	-123114 to -44190	42	<0,0001	****
Ctrl - Ox1RΔDAT
pre-NS	-35448 to 41697	56	0.9993	ns
pre-orexin	-42364 to 34781	56	0.9984	ns
NS	-45612 to 31534	56	0.9833	ns
orexin	-91052 to -13907	56	0.0037	**

## Sheet: Figure 2L
Numerical data
	pre-NS										pre-orexin										NS										orexin
Ctrl	8535	7565	4545	22170	10837.5	2665	22890	59997.5	67882.5		9350	8367.5	6767.5	23955	16462.5	3730	11370	28410	36305		22412.5	29582.5	44382.5	47260	28757.5	35987.5	60207.5	49192.5	57032.5		73342.5	76190	86477.5	56912.5	91720	56722.5	57857.5	77770	62182.5
Ox1RΔDAT	5515	14150	14612.5	10742.5	21250	7510	10085	9005	10117.5	59952.5	6932.5	9517.5	36457.5	5722.5	3782.5	45645	5772.5	7927.5	21410	21000	79152.5	34067.5	35912.5	102165	67192.5	96257.5	24472.5	49500	72842.5	48240	126902	92642.5	97727.5	173310	92857.5	97617.5	61567.5	70182.5	166370	47112.5
Statistics
Methods	Two-way RM ANOVA
Matching: Across row
Alpha	0.05
Source of Variation	% of total variation	DF	F (DFn, DFd)	P value	Significant?
Row Factor x Time	4.158	3	F (3, 51) = 3,228	0.0299	*
Row Factor	2.24	1	F (1, 17) = 3,373	0.0838	ns
Time	58.64	3	F (3, 51) = 45,52	<0,0001	****
Subject	11.29	17	F (17, 51) = 1,547	0.1159	ns
95% CI of difference between row means	-23940 to 1658
Šídák's multiple comparisons test	95,00% CI of diff,	DF	Adjusted P Value	Significant?
Ctrl - Ox1RΔDAT
pre-NS	-19897 to 33328	68	0.9472	ns
pre-orexin	-26950 to 26275	68	>0,9999	ns
NS	-45947 to 7278	68	0.2435	ns
orexin	-58222 to -4997	68	0.0134	*
Ctrl
pre-NS vs. pre-orexin	-23016 to 36876	51	0.9997	ns
pre-NS vs. NS	-48583 to 11310	51	0.5726	ns
pre-NS vs. orexin	-77956 to -18064	51	0.0002	***
pre-orexin vs. NS	-55513 to 4380	51	0.1523	ns
pre-orexin vs. orexin	-84886 to -24994	51	<0,0001	****
NS vs. orexin	-59320 to 572,9	51	0.0583	ns
Ox1RΔDAT
pre-NS vs. pre-orexin	-28532 to 28287	51	>0,9999	ns
pre-NS vs. NS	-73096 to -16277	51	0.0002	***
pre-NS vs. orexin	-114744 to -57926	51	<0,0001	****
pre-orexin vs. NS	-72973 to -16154	51	0.0002	***
pre-orexin vs. orexin	-114622 to -57803	51	<0,0001	****
NS vs. orexin	-70058 to -13239	51	0.0007	***

[truncated: 11 more sheets: Figure 2S1-A, Figure 2S1-B, Figure 2S2-A, Figure 2S2-B, Figure 2S2-E , Figure 2S2-C, Figure 2S2-D, Figure 2S2-F, Figure 2S3, Figure 2S4, Figure 2S5]
